# Supplementary material for: Association of Vasopressors Dose Trajectories with Enteral Nutrition Tolerance in Patients with Shock: A Prospective Observational Study
Source: MDPI journal article supplement (doi:10.3390/nu14245393), 2022-12-19
Supplement: s1 [file s1]

Supplementary Materials

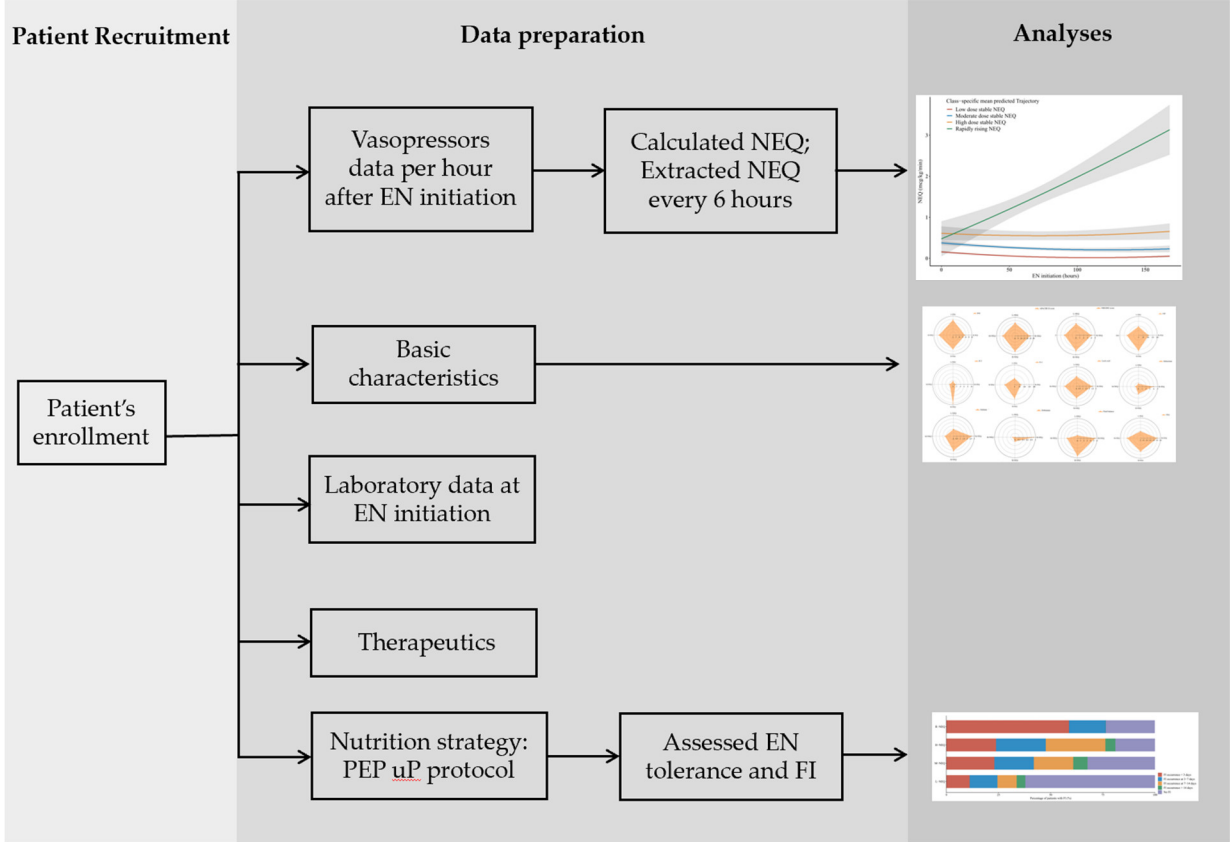

**Figure S1.** Simplified workflow of study. NEQ: norepinephrine equivalent dose; EN: enteral nutrition; FI: feeding intolerance.

Table S1. Growth Mixed Model results of NEQ model fitting progress.

| No. Latent class | Polynomial degree | Log-Lik   | BIC      | AIC      | Entropy | Relative entropy | % Participants per class          | Mean posterior probabilities        | % Posterior probabilities > 70%   |
|------------------|-------------------|-----------|----------|----------|---------|------------------|-----------------------------------|-------------------------------------|-----------------------------------|
| 1                | Linear            | -977.4762 | 1987.035 | 1966.95  | NA      | NA               | 100                               | NA                                  | NA                                |
| 1                | Quadratic         | -944.5013 | 1926.432 | 1903     | NA      | NA               | 100                               | NA                                  | NA                                |
| 1                | Cubic             | -2046.881 | 4136.539 | 4109.76  | NA      | NA               | 100                               | NA                                  | NA                                |
| 2                | Linear            | -746.6801 | 1546.831 | 1513.360 | 21.672  | 0.851            | 54.76/45.23                       | 0.946/0.979                         | 94.78/95.79                       |
| 2                | Quadratic         | -713.8582 | 1486.535 | 1449.717 | 21.717  | 0.851            | 54.76/45.23                       | 0.948/0.975                         | 94.74/94.79                       |
| 2                | Cubic             | -2029.302 | 4122.768 | 4082.603 | 144.595 | 0.007            | 88.57/11.43                       | 0.540/0.540                         | 0.00/4.17                         |
| 3                | Linear            | -652.2548 | 1379.369 | 1332.510 | 34.113  | 0.852            | 48.57/9.05/42.38                  | 0.928/0.963/0.948                   | 92.16/94.74/95.51                 |
| 3                | Quadratic         | -619.0748 | 1318.356 | 1268.150 | 34.117  | 0.852            | 42.38/48.57/9.05                  | 0.950/0.927/0.964                   | 95.51/92.16/94.74                 |
| 3                | Cubic             | -2022.968 | 4131.490 | 4077.936 | 228.948 | 0.008            | 29.52/65.24/5.24                  | 0.373/0.362/0.445                   | 0.00/0.00/0.00                    |
| 4                | Linear            | -639.1103 | 1374.469 | 1314.221 | 43.402  | 0.851            | 46.67/8.10/35.24/10.00            | 0.938/0.991/0.887/0.933             | 94.90/100.00/87.84/95.24          |
| 4                | Quadratic         | -605.8501 | 1313.295 | 1249.700 | 43.356  | 0.851            | 35.24/46.67/10.00/8.10            | 0.888/0.937/0.933/0.991             | 89.19/94.90/95.24/100.00          |
| 4                | Cubic             | -2025.599 | 4158.140 | 4091.198 | 288.179 | 0.010            | 2.86/59.52/32.86/4.76             | 0.338/0.281/0.284/0.380             | 0.00/0.00/0.00/0.00               |
| 5                | Linear            | -628.0249 | 1373.686 | 1300.050 | 53.642  | 0.841            | 46.19/10.48/8.10/25.71/9.52       | 0.924/0.795/0.994/0.891/0.903       | 89.69/81.82/100/88.89/90          |
| 5                | Quadratic         | -594.6466 | 1312.277 | 1235.293 | 53.816  | 0.841            | 46.19/10.48/25.71/8.10/9.52       | 0.923/0.796/0.891/0.993/0.904       | 87.63/81.82/87.04/100/90          |
| 5                | Cubic             | -2025.492 | 4179.315 | 4098.984 | 333.125 | 0.014            | 1.90/28.57/49.05/17.14/3.33       | 0.299/0.237/0.233/0.246/0.363       | 0.00/0.00/0.00/0.00/0.00          |
| 6                | Linear            | -628.0249 | 1395.075 | 1295.892 | 116.871 | 0.689            | 12.38/15.71/8.10/45.24/10.47/8.10 | 0.831/0.863/0.822/0.925/0.949/0.996 | 80.77/84.85/82.35/87.37/95.45/100 |
| 6                | Quadratic         | -588.5445 | 1321.461 | 1231.089 | 56.181  | 0.851            | 12.38/45.24/8.10/8.10/15.71/10.47 | 0.834/0.924/0.822/0.996/0.860/0.950 | 80.77/87.37/82.35/100/84.85/95.45 |
| 6                | Cubic             | -2027.606 | 4204.930 | 4111.211 | 368.807 | 0.020            | 1.43/1.43/59.52/29.05/5.71/2.86   | 0.262/0.227/0.208/0.208/0.226/0.338 | 0.00/0.00/0.00/0.00/0.00/0.00     |

NEQ: norepinephrine equivalent dose; BIC: Bayesian information criterion; AIC: Akaike information criterion; NA: Not acquire.

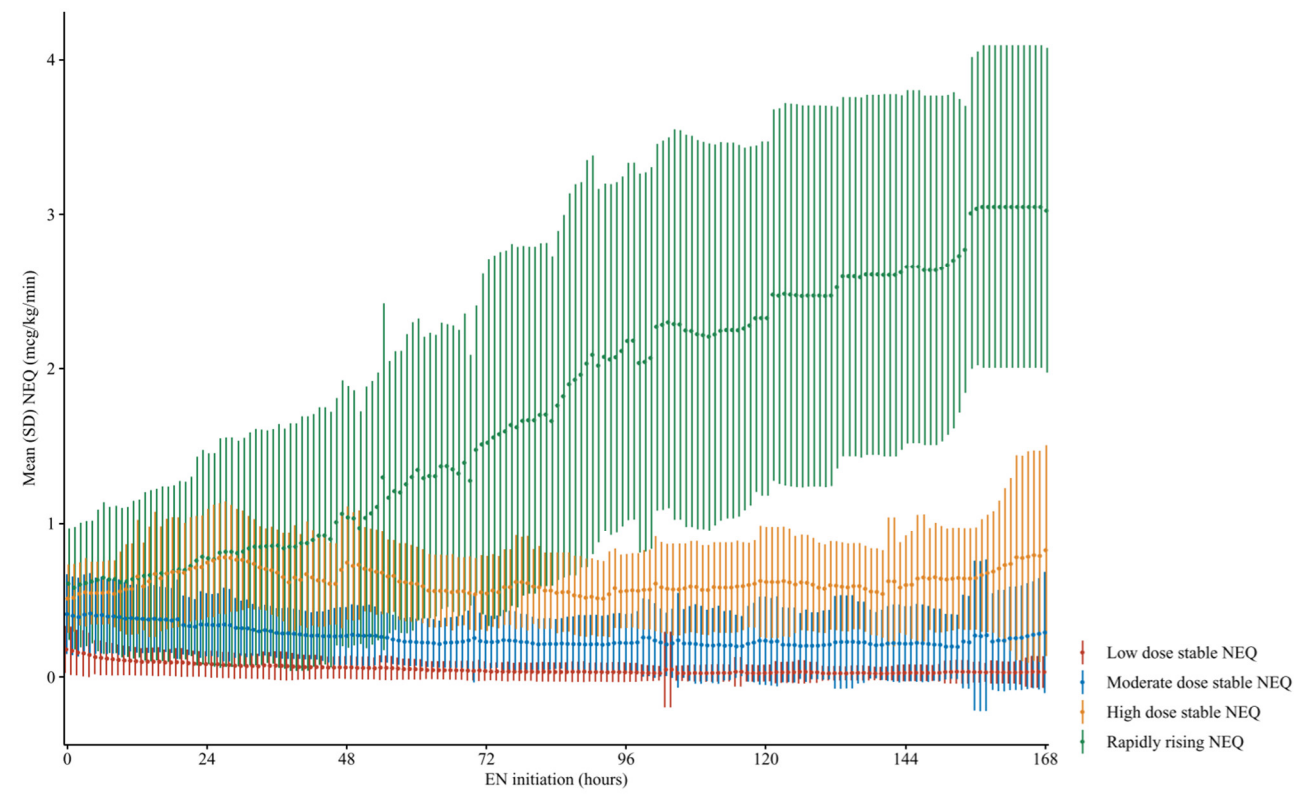

**Figure S2.** The dynamics of NEQ use in patients with shock across NEQ Trajectory Groups. EN, enteral nutrition; NEQ, norepinephrine equivalent dose; SD, standard deviation

**Table S2.** Basic characteristics of patients with or without FI in each group.

|                                        |      | L-NEQ            |                  |                 |            | M-NEQ            |                  |                 |            | H-NEQ           |                  |                 |            | R-NEQ            |                  |                  |            |
|----------------------------------------|------|------------------|------------------|-----------------|------------|------------------|------------------|-----------------|------------|-----------------|------------------|-----------------|------------|------------------|------------------|------------------|------------|
|                                        |      | Total<br>(n=98)  | Non-FI<br>(n=61) | FI<br>(n=37)    | P<br>value | Total<br>(n=74)  | Non-FI<br>(n=24) | FI<br>(n=50)    | P<br>value | Total<br>(n=21) | Non-FI<br>(n=4)  | FI<br>(n=17)    | P<br>value | Total<br>(n=21)  | Non-FI<br>(n=4)  | FI<br>(n=13)     | P<br>value |
| Age (years)                            |      | 63 (48-71.3)     | 66 (51-74)       | 53 (38.5-66.5)  | 0.007      | 64.5 (52-70)     | 58.5 (49.3-71.5) | 66 (52.8-69.3)  | 0.521      | 67 (53.5-76.5)  | 49 (46-70.8)     | 70 (58.5-76.5)  | 0.139      | 62 (45.5-73)     | 67.5 (48-72)     | 55 (45.5-73.5)   | 0.692      |
| Male no.(%)                            | Sex— | 66 (67.35)       | 41 (67.21)       | 25 (67.57)      | 0.971      | 47 (63.51)       | 16 (66.67)       | 31 (62)         | 0.696      | 14 (66.67)      | 3 (75)           | 11 (64.71)      | >0.999     | 14 (82.35)       | 4 (100)          | 10 (76.92)       | 0.541      |
| BMI                                    |      | 23.9 (21.5-25.8) | 23.9 (22.1-26.5) | 23 (20.7-25.6)  | 0.218      | 22.3 (19.9-24.7) | 21.3 (19.5-23.4) | 20 (20-25)      | 0.077      | 22 (19.5-23.8)  | 21.5 (19.5-24.6) | 22 (19.1-23.8)  | 0.823      | 18.7 (17.2-23.5) | 21.4 (17.8-25)   | 18.7 (16.9-22.1) | 0.257      |
| APACHE II score                        |      | 20.9 (15-26)     | 21 (16-26)       | 19 (14.5-25.5)  | 0.287      | 20 (12.8-25.3)   | 17 (10.5-27)     | 20 (13.8-25.3)  | 0.374      | 25 (15.5-27.5)  | 12.5 (10.3-21.5) | 26 (18-28)      | 0.025      | 24 (12-29)       | 29.5 (16-31)     | 21 (12-27)       | 0.189      |
| NRS2002 score (IQR)                    |      | 3 (3-4)          | 3 (3-4)          | 3 (3-4)         | 0.138      | 3 (3-4.3)        | 3.5 (3-6)        | 3 (3-4)         | 0.146      | 4 (3-5.5)       | 3 (3-3.8)        | 4 (3-6)         | 0.110      | 4 (3-6)          | 6 (3.8-6.8)      | 4 (3-6)          | 0.239      |
| Diagnose—no.(%)                        |      |                  |                  |                 |            |                  |                  |                 |            |                 |                  |                 |            |                  |                  |                  |            |
| Severe pneumonia                       |      | 34 (34.69)       | 22 (36.07)       | 12 (32.43)      | 0.714      | 38 (51.35)       | 14 (58.33)       | 24 (48)         | 0.405      | 13 (61.9)       | 3 (75)           | 10 (58.82)      | 0.978      | 7 (41.18)        | 1 (25)           | 6 (46.15)        | 0.603      |
| ARDS                                   |      | 10 (10.2)        | 6 (9.84)         | 4 (10.81)       | >0.999     | 4 (5.41)         | 2 (8.33)         | 2 (4)           | 0.824      | 3 (14.29)       | 0 (0)            | 3 (17.65)       | 0.910      | 3 (17.65)        | 1 (25)           | 2 (15.38)        | >0.999     |
| MODS                                   |      | 14 (14.29)       | 7 (11.48)        | 7 (18.92)       | 0.307      | 8 (10.81)        | 2 (8.33)         | 6 (12)          | 0.940      | 2 (9.52)        | 0 (0)            | 2 (11.76)       | >0.999     | 5 (29.41)        | 0 (0)            | 5 (38.46)        | 0.261      |
| Liver disease                          |      | 9 (9.18)         | 8 (13.11)        | 1 (2.7)         | 0.147      | 3 (4.05)         | 1 (4.17)         | 2 (4)           | >0.999     | 2 (9.52)        | 0 (0)            | 2 (11.76)       | >0.999     | 3 (17.65)        | 0 (0)            | 3 (23.08)        | 0.541      |
| Cardiac arrest                         |      | 14 (14.29)       | 8 (13.11)        | 6 (16.22)       | 0.671      | 6 (8.11)         | 2 (8.33)         | 4 (8)           | >0.999     | 2 (9.52)        | 0 (0)            | 2 (11.76)       | >0.999     | 2 (11.76)        | 1 (25)           | 1 (7.69)         | 0.426      |
| Cardiovascular disease*                |      | 57 (58.16)       | 35 (57.38)       | 22 (59.46)      | 0.839      | 46 (62.16)       | 16 (66.67)       | 30 (60)         | 0.58       | 14 (66.67)      | 3 (75)           | 11 (64.71)      | 0.694      | 13 (76.47)       | 2 (50)           | 11 (84.62)       | 0.219      |
| Neurological disease†                  |      | 42 (42.86)       | 31 (50.82)       | 11 (29.73)      | 0.041      | 30 (40.54)       | 9 (37.5)         | 21 (42)         | 0.712      | 10 (47.62)      | 1 (25)           | 9 (52.94)       | 0.652      | 3 (17.65)        | 1 (25)           | 2 (15.38)        | >0.999     |
| Types of shock—no.(%)                  |      |                  |                  |                 |            |                  |                  |                 |            |                 |                  |                 |            |                  |                  |                  |            |
| Sepsis shock                           |      | 80 (81.63)       | 49 (80.33)       | 31 (83.78)      | 0.668      | 62 (83.78)       | 23 (95.83)       | 39 (78)         | 0.051      | 19 (90.48)      | 4 (100)          | 15 (88.24)      | >0.999     | 17 (100)         | 4 (100)          | 13 (100)         | >0.999     |
| Cardiac shock                          |      | 10 (10.2)        | 6 (9.84)         | 4 (10.81)       | >0.999     | 10 (13.51)       | 2 (8.33)         | 8 (16)          | 0.589      | 1 (4.76)        | 0 (0)            | 1 (5.88)        | >0.999     | 1 (5.88)         | 0 (0)            | 1 (7.69)         | 1          |
| Hemorrhagic shock                      |      | 13 (13.27)       | 9 (14.75)        | 4 (10.81)       | 0.802      | 10 (13.51)       | 2 (8.33)         | 8 (16)          | 0.589      | 2 (9.52)        | 0 (0)            | 2 (11.76)       | >0.999     | 0 (0)            | 0 (0)            | 0 (0)            | 0.429      |
| Laboratory data, median (IQR)          |      |                  |                  |                 |            |                  |                  |                 |            |                 |                  |                 |            |                  |                  |                  |            |
| White blood cell (x10 <sup>9</sup> /L) |      | 10 (7.6-13.7)    | 9.7 (7.3-13.8)   | 10.5 (8.2-13.8) | 0.410      | 11.5 (8.2-14.3)  | 10 (6.2-14.5)    | 11.9 (9.4-14.1) | 0.184      | 13.7 (9.3-16.2) | 21 (10.7-27.3)   | 12.8 (9.3-15.3) | 0.107      | 10.4 (4.5-18.8)  | 18.8 (12.1-28.1) | 8.1 (3.2-14.5)   | 0.042      |

|                                            |                    |                   |                        |            |                    |                    |                         |             |                   |                   |                        |             |                   |                    |                   |             |
|--------------------------------------------|--------------------|-------------------|------------------------|------------|--------------------|--------------------|-------------------------|-------------|-------------------|-------------------|------------------------|-------------|-------------------|--------------------|-------------------|-------------|
| Platelet (x10 <sup>9</sup> /L)             | 95.5 (55.5-205.3)  | 86 (183.5)        | (53.5-113 238)         | (55-0.326  | 109 (61-171)       | 74.5 (165)         | (44.8-122 187)          | (71.3-0.050 | 87 (40-129.5)     | 45 (104)          | (7.8-101 137.5)        | (52-0.152   | 72 (22.5-130.5)   | 185 (241.3)        | (86.8-36 96.5)    | (18-0.024   |
| Hemoglobin (g/L)                           | 83.5 (72-98.3)     | (72-83 (72-102)   | 87 (70.5-96.5)         | 0.781      | 89 (78.8-100.3)    | 83 (96.5)          | (78.3-90.5 (79.5-101.8) | 0.355       | 91 (76.5-103.5)   | 74 (102.5)        | (66.5-91 103.5)        | (82-0.244   | 87 (74.5-118)     | 108.5 (82.5-123.3) | 84 (71.5-107.5)   | 0.308       |
| Albumin (g/L)                              | 32.3 (29.3-36)     | 31.6 (34.7)       | (29.1-34.2 (30.2-37.9) | 0.012      | 31.8 (28.6-34.8)   | 32.7 (36)          | (28.7-31.1 (28.6-34.1)  | 0.453       | 30.8 (28.8-37.3)  | 28.7 (37.1)       | (21.6-32.2 (29.3-37.3) | 0.282       | 34.4 (32.7-37)    | 36.7 (34.1-38.4)   | 34.2 (31.7-35.8)  | 0.234       |
| Total bilirubin (umol/L)                   | 16.9 (10.3-32.1)   | 15 (10-27)        | (10.6-22.7 (10.6-39.9) | 0.132      | 17.9 (8.6-33.7)    | 18.8 (34.2)        | (9.5-16.3 (7.6-33.7)    | 0.738       | 15.9 (12.3-21.2)  | 19 (22.1)         | (12.3-15.8 (12.3-24.8) | 0.591       | 27.6 (15.8-41.2)  | 14.1 (11.1-24.7)   | 37.2 (16-48.2)    | 0.070       |
| Serum creatinine (umol/L)                  | 93 (62.8-164.5)    | 89 (166.5)        | (61-94 162.5)          | (67-0.778  | 81.5 (57.8-150.8)  | 81 (166.3)         | (50.5-82.5 (58.8-144.8) | 0.899       | 100 (72-142.5)    | 104 (138.8)       | (74.5-100 159)         | (68-0.893   | 90 (63.5-124.5)   | 74 (163.8)         | (65.3-98 124.5)   | (59.5-0.821 |
| Glucose (mmol/L)                           | 8.4 (6.5-11.4)     | 8.2 (11.4)        | (6.4-8.5 11.4)         | (6.6-0.517 | 9.3 (6.7-13.5)     | 10.8 (13.8)        | (7.1-9.2 13.3)          | (6.4-0.365  | 10.5 (8.7-12.6)   | 9.8 (10.7)        | (8.8-11 13.1)          | (8.6-0.420  | 8.9 (7-11.8)      | 8.4 (11.9)         | (4.7-8.9 12.1)    | (8.1-0.497  |
| C-reactive protein (mg/L)                  | 93 (56.4-136.3)    | 88.7 (34.4-131.5) | 102 (67.1-203.5)       | 0.088      | 122.5 (69.1-172.3) | 135 (71.4-169)     | (111.5 (67.2-175.3)     | 0.742       | 162 (123-236.5)   | 193.5 (240.8)     | (129-162 225.5)        | (116-0.622  | 107 (39.3-178)    | 148 (180.5)        | (99.1-78.8 171.5) | (23-0.308   |
| Procalcitonin (ug/L)                       | 1.6 (0.4-6.9)      | 1.3 (5.1)         | (0.4-2.9 11.6)         | (0.4-0.291 | 1.8 (0.7-7.2)      | 1.7 (6.6)          | (0.8-2.2 8.3)           | (0.5-0.751  | 10.3 (0.8-21.7)   | 8.2 (39.1)        | (0.9-10.3 21.7)        | (0.8-0.858  | 1.3 (0.7-8.2)     | 1.1 (9)            | (0.5-2.8 17.5)    | (0.7-0.651  |
| Interleukin-6 (ug/L)                       | 64.8 (26.5-151.5)  | 52.4 (26.5-133.5) | 74.3 (29.3-213.2)      | 0.397      | 101 (38.6-281.6)   | 138.6 (42.5-334.5) | 101 (32.2-243.5)        | 0.288       | 140 (43.9-523.7)  | 409 (991.3)       | (97.2-137 354.7)       | (35.7-0.244 | 64.9 (37-168.7)   | 78 (835)           | (48.5-64.3 168.7) | (32.5-0.428 |
| Lactic acid (mmol/L)                       | 1.5 (1.2-1.8)      | 1.5 (1.8)         | (1.2-1.6 1.9)          | (1.2-0.749 | 1.8 (1.4-2.3)      | 2 (1.5-2.4)        | 1.8 (1.4-2.2)           | 0.325       | 1.8 (1.4-2.5)     | 2 (1.7-2.8)       | 1.8 (1.4-2.5)          | 0.419       | 2.4 (1.4-3.6)     | 2.5 (3.1)          | (1.7-2.4 4.5)     | (1.3-0.955  |
| Arterial partial pressure of oxygen (mmHg) | 104.4 (78.9-122.6) | 104 (83.9-129.1)  | 104.7 (71.8-120.1)     | 0.383      | 98.3 (70.7-126.1)  | 89 (51.7-117.5)    | 99.7 (75.1-130.2)       | 0.321       | 93.5 (62.8-132.8) | 83.6 (36.1-149.5) | 93.5 (71.3-132.8)      | 0.591       | 77.9 (69.2-124.8) | 85.5 (69.4-137.6)  | 77.9 (63.6-124.8) | 0.910       |
| Arterial oxygen saturation (%)             | 98.8 (96.5-99.6)   | 98.9 (97.1-99.6)  | 98.7 (94.5-99.7)       | 0.468      | 98.6 (96.2-99.3)   | 98.2 (86.8-99.6)   | 98.8 (96.7-99.3)        | 0.499       | 98.5 (91-99.3)    | 89.4 (99.7)       | 98.5 (76-92.8-99.2)    | 0.929       | 96.8 (93.8-99.3)  | 97.6 (93.4-99.5)   | 96.8 (89-99.3)    | 0.865       |
| Sedation and analgesia                     |                    |                   |                        |            |                    |                    |                         |             |                   |                   |                        |             |                   |                    |                   |             |
| Midazolam (mg/kg/day)                      | 0.7±1              | 0.7±1             | 0.5±1                  | 0.382      | 0.7±1.1            | 0.8±1.3            | 0.7±1                   | 0.817       | 1.9±2.6           | 3.7±5.5           | 1.5±1.5                | 0.488       | 3.8±9.1           | 11.2±18.4          | 1.5±1             | 0.367       |
| Propofol (mg/kg/day)                       | 5.5±6.7            | 6.1±7.6           | 4.3±4.7                | 0.151      | 4.3±5.6            | 2.7±3.9            | 5.1±6.2                 | 0.086       | 5.4±5.5           | 1.7±3.4           | 6.3±5.6                | 0.139       | 8±8               | 14±6.7             | 6.1±7.6           | 0.084       |
| Dexmedetomidine (ug/kg/day)                | 1.9±2.1            | 1.8±2.2           | 2.2±2                  | 0.384      | 3.1±6.7            | 2.6±2.6            | 3.3±7.9                 | 0.663       | 1.4±2.4           | 2.8±4.1           | 1.1±1.9                | 0.222       | 2.9±3.6           | 4.2±5.8            | 2.4±2.9           | 0.404       |
| Remifentanyl (ug/kg/day)                   | 33.8±62.6          | 41.8±72.1         | 20.7±40                | 0.065      | 40.4±56.8          | 39.4±69.3          | 40.8±50.5               | 0.920       | 44.1±70.9         | 24.5±49.1         | 48.7±75.5              | 0.553       | 39.3±58.2         | 74.8±82.3          | 28.4±47.7         | 0.170       |
| Sufentanyl (ug/kg/day)                     | 1±1.7              | 0.9±1.7           | 1.2±1.9                | 0.330      | 1.2±1.9            | 1±1.9              | 1.3±1.9                 | 0.512       | 2.1±2.2           | 1.5±1.3           | 2.3±2.3                | 0.501       | 2.6±2.9           | 3±4.4              | 2.5±2.5           | 0.747       |

| Treatment—<br>no.(%)                                     |             |                  |                  |                |              |                  |                   |                |             |                  |                  |                |             |                  |                      |                |  |
|----------------------------------------------------------|-------------|------------------|------------------|----------------|--------------|------------------|-------------------|----------------|-------------|------------------|------------------|----------------|-------------|------------------|----------------------|----------------|--|
| Norepineph-<br>rine at EN initi-<br>ation<br>(ug/kg/min) | 0.2<br>0.3) | (0.1-0.1<br>0.2) | (0.1-0.2<br>0.3) | (0.1-<br>0.081 | 0.4<br>0.6)  | (0.2-0.4<br>0.6) | (0.1-0.4<br>0.6)  | (0.2-<br>0.940 | 0.4<br>0.6) | (0.3-0.4<br>0.5) | (0.4-0.5<br>0.7) | (0.3-<br>0.720 | 0.5<br>0.7) | (0.4-0.4<br>0.5) | (0.2-<br>0.5 (0.4-1) | 0.061          |  |
| NEQ at EN<br>initiation<br>(ug/kg/min)                   | 0.2<br>0.2) | (0.1-0.1<br>0.2) | (0.1-0.2<br>0.3) | (0.1-<br>0.175 | 0.4<br>0.6)  | (0.2-0.4<br>0.6) | (0.1-0.4<br>0.6)  | (0.2-<br>0.940 | 0.4<br>0.6) | (0.3-0.4<br>0.5) | (0.4-0.5<br>0.7) | (0.3-<br>0.720 | 0.5<br>0.7) | (0.4-0.4<br>0.5) | (0.2-0.5<br>1.1)     | (0.4-<br>0.061 |  |
| Prokinetics                                              | 53 (54.08)  | 28 (45.9)        | 25<br>(67.57)    | 0.037          | 28 (37.84)   | 5 (20.83)        | 23 (46)           | 0.037          | 10 (47.62)  | 0 (0)            | 10 (58.82)       | 0.090          | 3 (17.65)   | 1 (25)           | 2 (15.38)            | >0.999         |  |
| CRRT                                                     | 30 (30.93)  | 12 (20)          | 18<br>(48.65)    | 0.003          | 29 (39.19)   | 9 (37.5)         | 20 (40)           | >0.999         | 9 (42.86)   | 1 (25)           | 8 (47.06)        | 0.603          | 8 (47.06)   | 1 (25)           | 7 (53.85)            | 0.576          |  |
| ECMO                                                     | 9 (9.28)    | 5 (8.33)         | 4 (10.81)        | 0.683          | 2 (2.7)      | 1 (4.17)         | 1 (2)             | >0.999         | 0 (0)       | 0 (0)            | 0 (0)            |                | 2 (11.76)   | 0 (0)            | 2 (15.38)            | >0.999         |  |
| Inotropic<br>drugs                                       | 22 (22.4)   | 14 (23)          | 8 (21.6)         | 0.878          | 10 (41.7)    | 26 (52)          | 36 (48.6)         | 0.405          | 16 (76.2)   | 2 (50)           | 14 (82.4)        | 0.228          | 11 (64.7)   | 1 (9.1)          | 10 (76.9)            | 0.099          |  |
| Dobuta-<br>mine<br>(ug/kg/day)                           | 0±0         | 0±0              | 0±0.1            | 0.324          | 0.1±0.9      | 0±0              | 0.2±1.1           | 0.400          | 0.2±0.7     | 0±0.1            | 0.3±0.8          | 0.896          | 0.6±2.3     | 0±0              | 0.7±2.7              | 0.596          |  |
| Cumulative<br>fluid balance at<br>first week (L)         | 0.8±4.3     | 0.8±4.8          | 0.9±3.6          | 0.947          | 2.5<br>(5.1) | (0.1-2.4<br>4.6) | (-0.9-2.5<br>5.7) | (0.2-<br>0.496 | 5.4±8.9     | 0.9±4.1          | 6.4±9.5          | 0.282          | 5.4±3.9     | 6.4±1.4          | 5.1±4.4              | 0.571          |  |

All P values are 2-tailed. Differences was analyzed between patients with and without FI in each trajectory group. APACHE II, Acute Physiology and Chronic Health Evaluation II; ARDS, acute respiratory distress syndrome; BMI, body mass index; CRRT, continuous renal replacement therapy; ECMO, extracorporeal membrane oxygenation; FI, feeding intolerance; IQR, interquartile range; MODS, multiple organ dysfunction syndrome; NRS2002, Nutritional Risk Screening 2002; NEQ, norepinephrine equivalent dose; SD, standard deviation; L-NEQ, low dose stable NEQ; M-NEQ, moderate dose stable NEQ; H-NEQ, high dose stable NEQ; R-NEQ, rapidly rising NEQ

\*Cardiovascular diseases are coronary heart disease, hypertension, acute myocardial infarction, infectious endocarditis, arrhythmia, cardiomyopathy, cardiac insufficiency, cardiac failure, and pericardial effusion.

†Neurological diseases are Parkinson's disease, hypoxic-ischemic encephalopathy, epilepsy, cerebral contusion, subarachnoid hemorrhage, intracranial infection, cerebral infarction, brain atrophy, intra-cranial hematoma, and stroke.

**Table S3.** Clinical outcomes in patients with or without FI in each trajectory groups.

|                                                                                          | Low dose stable NEQ |                  |                  |            | Moderate dose stable NEQ |                  |                  |            | High dose stable NEQ |                 |                  |            | Rapidly rising NEQ |                     |                 |            |
|------------------------------------------------------------------------------------------|---------------------|------------------|------------------|------------|--------------------------|------------------|------------------|------------|----------------------|-----------------|------------------|------------|--------------------|---------------------|-----------------|------------|
|                                                                                          | Total<br>(n=98)     | Non-FI<br>(n=61) | FI<br>(n=37)     | P<br>value | Total<br>(n=74)          | Non-FI<br>(n=24) | FI<br>(n=50)     | P<br>value | Total<br>(n=21)      | Non-FI<br>(n=4) | FI<br>(n=17)     | P<br>value | Total<br>(n=21)    | Non-<br>FI<br>(n=4) | FI<br>(n=13)    | P<br>value |
| EN starting time<br>from ICU admission (hours),<br>median (IQR)                          | 25.1 (17.8-46.4)    | 24.8 (17.7-44.3) | 25.8 (18.2-88)   | 0.174      | 34.8 (17.1-60.1)         | 35.3 (15.8-63.6) | 33.8 (17.9-59.7) | 0.926      | 35.6 (18.7-72.3)     | 20.8 (9.7-61.7) | 36.7 (19.5-77.3) | 0.771      | 36.7 (20.2-71.8)   | 22.7 (16.7-33.8)    | 45 (22.2-96.3)  | 0.113      |
| The EN intake at<br>first week after<br>EN initiation,<br>median (IQR)                   |                     |                  |                  |            |                          |                  |                  |            |                      |                 |                  |            |                    |                     |                 |            |
| Energy<br>(kcal/kg)                                                                      | 8 (4.8-11.9)        | 8 (4.2-12.7)     | 8 (5.5-10.6)     | 0.711      | 9.9 (6.8-14.2)           | 8.9 (8.4-17.1)   | 9 (5.9-14.4)     | 0.086      | 7.7 (4.1-10.8)       | 6.9 (2.6-13.5)  | 7 (2.6-10.1)     | 0.128      | 5.5 (3.4-11)       | 9 (5.3-12.3)        | 4.4 (2.8-8.5)   | 0.174      |
| Protein<br>(g/kg)                                                                        | 0.3 (0.2-0.5)       | 0.3 (0.2-0.5)    | 0.3 (0.2-0.4)    | 0.401      | 0.4 (0.3-0.6)            | 0.3 (0.3-0.7)    | 0.3 (0.2-0.6)    | 0.071      | 0.3 (0.2-0.4)        | 0.3 (0.3-0.6)   | 0.3 (0.1-0.4)    | 0.210      | 0.2 (0.1-0.5)      | 0.2 (0.1-0.5)       | 0.2 (0.2-0.3)   | 0.174      |
| Fat (g/kg)                                                                               | 0.2 (0.1-0.4)       | 0.2 (0.1-0.4)    | 0.2 (0.1-0.4)    | 0.517      | 0.3 (0.1-0.4)            | 0.2 (0.1-0.4)    | 0.3 (0.1-0.4)    | 0.301      | 0.2 (0-0.3)          | 0.3 (0.2-0.7)   | 0.3 (0-0.3)      | 0.128      | 0.2 (0-0.4)        | 0.3 (0.3-0.6)       | 0.1 (0-0.3)     | 0.042      |
| The total nutri-<br>tion intake at<br>first week after<br>EN initiation,<br>median (IQR) |                     |                  |                  |            |                          |                  |                  |            |                      |                 |                  |            |                    |                     |                 |            |
| Energy<br>(kcal)                                                                         | 19 (13.9-24.8)      | 19.1 (12.6-24.7) | 18.9 (14.5-25.4) | 0.397      | 20.1 (14.2-25.1)         | 22.2 (14.6-25.1) | 19.3 (12.8-25.8) | 0.622      | 18.6 (10.9-23.9)     | 18.1 (9.3-30.4) | 18.6 (12.3-22.7) | >0.999     | 16.8 (10.6-23.1)   | 22.6 (13.3-36.9)    | 13.2 (8.8-22.2) | 0.113      |
| Protein (g)                                                                              | 0.7 (0.5-0.9)       | 0.7 (0.5-0.7)    | 0.7 (0.5-0.9)    | 0.647      | 0.6 (0.5-1)              | 0.7 (0.5-0.7)    | 0.6 (0.5-0.9)    | 0.581      | 0.6 (0.4-0.9)        | 0.7 (0.4-1.1)   | 0.6 (0.3-0.9)    | 0.858      | 0.3 (0.2-0.8)      | 0.7 (0.2-1.5)       | 0.2 (0.4-0.6)   | 0.070      |
| Fat (g)                                                                                  | 0.7 (0.4-0.9)       | 0.7 (0.4-0.7)    | 0.7 (0.4-0.8)    | 0.956      | 0.6 (0.4-0.9)            | 0.6 (0.4-0.9)    | 0.6 (0.4-0.9)    | 0.796      | 0.7 (0.3-0.9)        | 0.6 (0.3-1.4)   | 0.7 (0.2-0.8)    | 0.788      | 0.4 (0.2-0.9)      | 0.9 (0.2-1.7)       | 0.3 (0.4-0.7)   | 0.042      |
| MV (day), median<br>(IQR)                                                                | 12.5 (5.5-23.1)     | 10.1 (4.7-22)    | 15.5 (9.3-33.8)  | 0.031      | 15 (9.9-25.3)            | 11.7 (6.5-16.8)  | 16.4 (10.5-27.8) | 0.031      | 10.9 (5.4-17.6)      | 3.7 (3-7.1)     | 13.1 (9.1-18.2)  | 0.007      | 6.6 (5.1-7.7)      | 5.7 (5.1-7.3)       | 6.9 (4.7-8.4)   | 0.213      |
| ICU Length of<br>stay (day), median<br>(IQR)                                             | 17.5 (11.8-25.3)    | 16 (9.3-23.5)    | 22 (13.8-40)     | 0.007      | 17 (12-27.1)             | 13.6 (12-18.8)   | 13 (13-29.6)     | 0.049      | 12 (7-18.2)          | 8 (4.3-11.4)    | 14 (9.8-19.5)    | 0.044      | 7.6 (6-9)          | 7 (6-8.8)           | 7.6 (6.2-9)     | 0.690      |
| 28-days mortality<br>—no.(%)                                                             | 15 (15.31)          | 11 (18.03)       | 4 (10.81)        | 0.501      | 28 (37.84)               | 9 (37.5)         | 19 (38)          | 0.967      | 13 (61.9)            | 3 (75)          | 10 (58.82)       | >0.999     | 17 (100)           | 4 (100)             | 13 (100)        |            |

All P values are 2-tailed. Differences was analyzed between patients with and without FI in each trajectory group. EN enteral nutrition; FI feeding intolerance; NEQ, norepinephrine equivalent dose; ICU intensive care unit; IQR, interquartile range; MV mechanical ventilation; L-NEQ, low dose stable NEQ; M-NEQ, moderate dose stable NEQ; H-NEQ, high dose stable NEQ; R-NEQ, rapidly rising NEQ

**Table S4.** Cox proportional hazard regression analysis of the effect of NEQ trajectory groups on 28-days mortality.

|                                            | Model 1                  |                | Model 2                  |                | Model 3                  |                | Model 4                  |                |
|--------------------------------------------|--------------------------|----------------|--------------------------|----------------|--------------------------|----------------|--------------------------|----------------|
| 28-days mortality                          | HR (95% CI)              | <i>P</i> Value |
| Baseline joint groups                      |                          |                |                          |                |                          |                |                          |                |
| Low dose stable NEQ                        | 1.0 (Ref)                |                | 1.0 (Ref)                |                | 1.0 (Ref)                |                | 1.0 (Ref)                |                |
| Moderate dose stable NEQ                   | 2.79 (1.489, 5.228)      | 0.001          | 2.614 (1.344, 5.084)     | 0.005          | 2.726 (1.399, 5.312)     | 0.003          | 2.611 (1.333, 5.113)     | 0.004          |
| High dose stable NEQ                       | 6.084 (2.887, 12.822)    | < 0.001        | 5.472 (2.416, 12.396)    | < 0.001        | 5.514 (2.46, 12.357)     | < 0.001        | 5.967 (2.625, 13.563)    | < 0.001        |
| Rapidly rising NEQ                         | 87.212 (34.882, 218.042) | < 0.001        | 79.977 (29.734, 215.118) | < 0.001        | 86.538 (32.283, 231.974) | < 0.001        | 85.942 (31.063, 237.776) | < 0.001        |
| P for trend                                | <0.001                   |                | <0.001                   |                | <0.001                   |                | <0.001                   |                |
| Covariates                                 |                          |                |                          |                |                          |                |                          |                |
| Age (years)                                |                          |                | 1.022 (1.006, 1.039)     | 0.009          | 1.019 (1.002, 1.037)     | 0.028          | 1.02 (1.002, 1.038)      | 0.028          |
| BMI                                        |                          |                | 0.922 (0.859, 0.989)     | 0.024          | 0.905 (0.841, 0.974)     | 0.008          | 0.901 (0.835, 0.972)     | 0.007          |
| NEQ at EN initiation (µg/kg/min)           |                          |                | 0.69 (0.261, 1.819)      | 0.452          | 0.579 (0.225, 1.495)     | 0.259          | 0.445 (0.168, 1.18)      | 0.104          |
| APACHE II score                            |                          |                |                          |                | 1.03 (1.001, 1.06)       | 0.042          | 1.029 (0.999, 1.06)      | 0.062          |
| Dobutamine (µg/kg/day)                     |                          |                |                          |                |                          |                | 1.028 (0.869, 1.215)     | 0.748          |
| Cumulative fluid balance at first week (L) |                          |                |                          |                |                          |                | 0.997 (0.958, 1.038)     | 0.891          |
| Lactic acid (mmol/L)                       |                          |                |                          |                |                          |                | 1.374 (1.17, 1.614)      | < 0.001        |

Model 1 was unadjusted. Model 2 was adjusted for age, BMI and NEQ at EN initiation. Model 3 was adjusted for age, BMI, NEQ at EN initiation, and APACHE II score. Model 4 was adjusted for age, BMI, NEQ at EN initiation, APACHE II score, dobutamine and cumulative fluid balance at first week. APACHE II: acute physiology and chronic health evaluation II, BMI: body mass index, CI: confidence interval, HR: hazard ratio, EN: enteral nutrition, NEQ: norepinephrine equivalent dose.

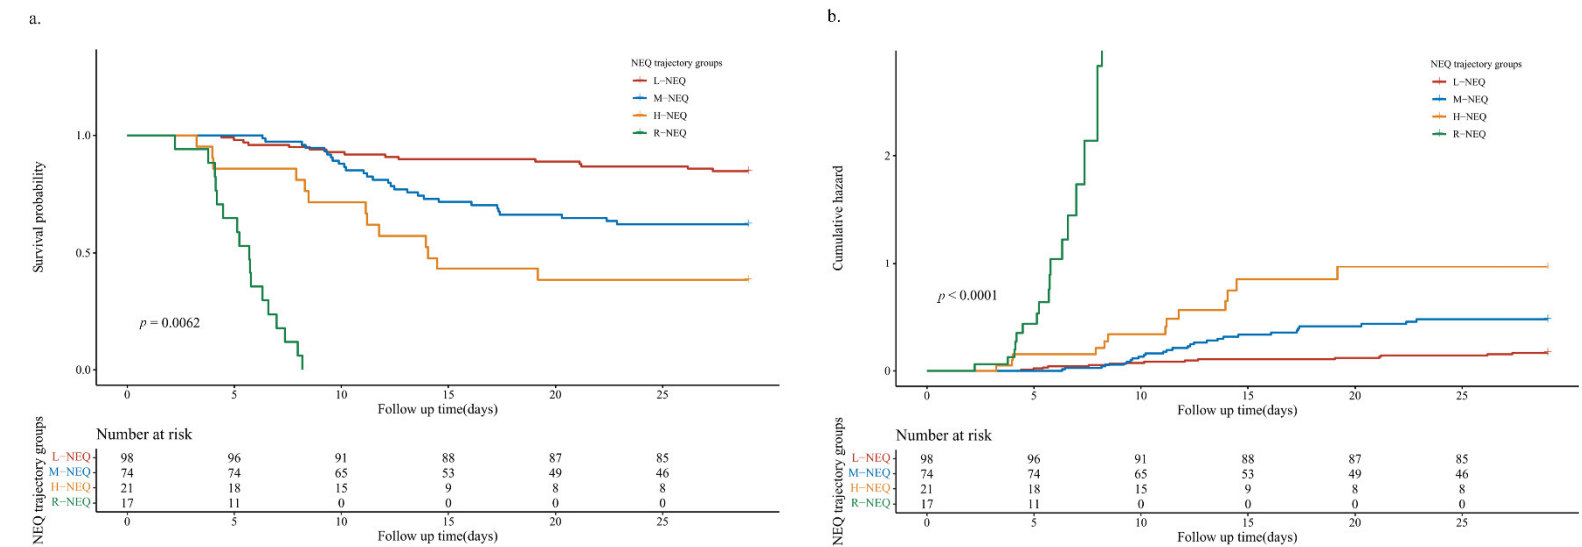

**Figure S3.** Kaplan-Meier survival curves (a.) and cumulative risk (b.) of 28-days mortality for NEQ trajectory groups. NEQ, norepinephrine equivalent dose.
